# Supplementary material
Source: publisher figshare collection journal article supplement (https://frontiersin.figshare.com/ndownloader/files/15445745)
Supplement: Supplementary file 1 [file 15445745]

(A)

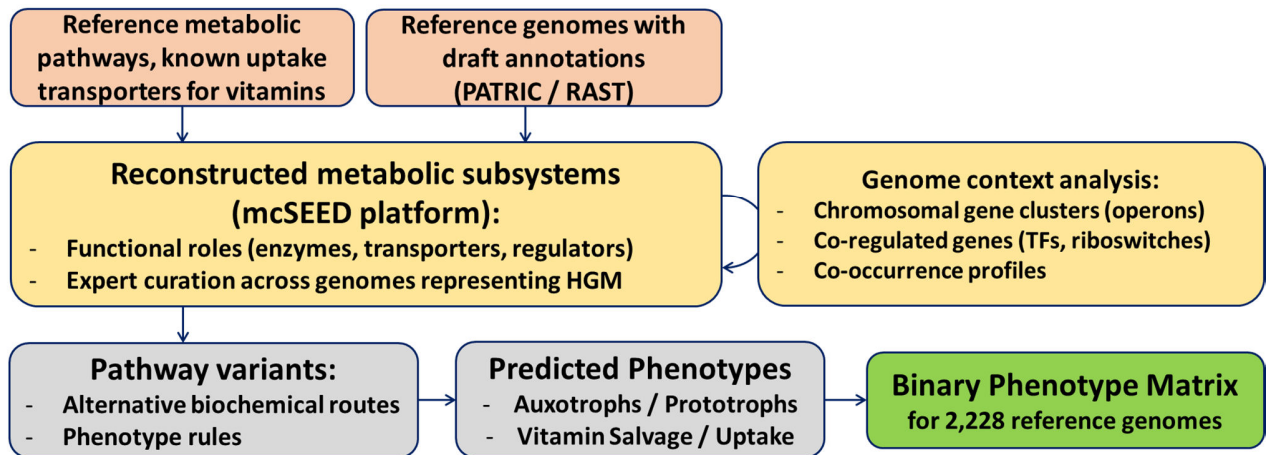

(B)

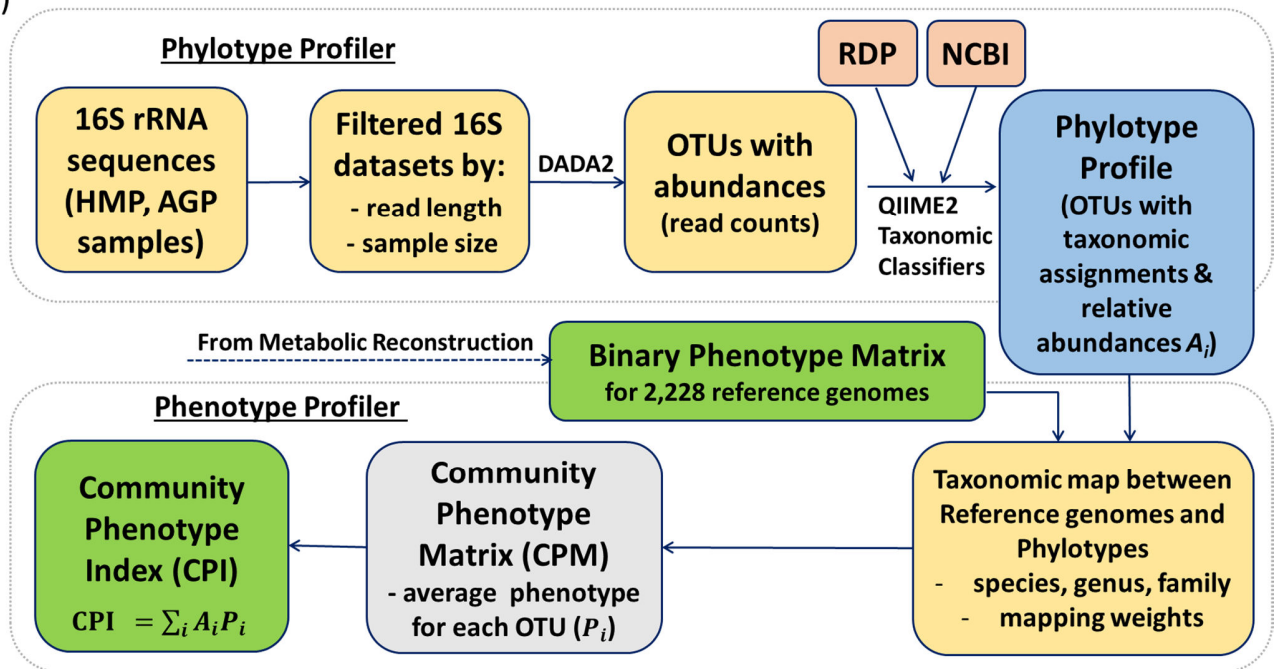

Figure S2. Workflows used for (A) comparative genomics reconstruction of metabolic pathways and phenotype assignments in reference genomes, and (B) predictive phenotype profiling of 16S communities.
